# Supplementary material for: Use of complementary and integrative health (CIH) in Finland: a cross-sectional survey
Source: Research Square preprint supplement (doi:10.21203/rs.3.rs-2757324/v1), 2023-05-04
Supplement: Supplementary file 1 [file 800a041202463ad072b276bb.docx]

**Supplementary material, questionary (I-CAM-QFI) for Pyykkönen et al.: Use of complementary and integrative health (CIH) in Finland: a cross-sectional survey**

| | 137 - VDC: | Single coded | | --- | --- | |
| --- | --- | --- |
| | Not back | | --- | |
| | Tervetuloa vastaamaan kyselyyn. Siinä kootaan suomalaisten käsityksiä, kokemuksia ja arvostuksia erilaisista terveyden ja sairauksien hoitomuodoista tieteellistä tutkimusta varten. Vastauksesi ovat erittäin tärkeitä tutkimuksen onnistumisen kannalta. Olemme kiinnostuneita juuri sinun näkemyksistäsi ja kokemuksistasi.  Tavoitteena on tuottaa uutta tutkimustietoa, jota voidaan myös hyödyntää suomalaisen terveydenhuollon kehittämisessä. Vastaaminen on täysin vapaaehtoista ja voit keskeyttää sen missä vaiheessa tahansa. Voit myös peruuttaa suostumuksesi osallistua tutkimukseen. Vastauksia käsitellään nimettömästi. Kun tutkimuksen tuloksia julkaistaan tai esitellään, tulokset esitetään ryhmätasolla, ei yksilötasolla. Kyselyaineistoa säilytetään tutkijoiden hallinnoimilla salasanasuojatulla levyasemalla ja tietokoneilla tutkimuksen ajan. Aineistoon on pääsy vain niillä, joille on myönnetty siihen käyttöoikeus. Tutkimuksen päätyttyä aineisto arkistoidaan Tampereen yliopiston tietoarkistoon. | | --- | |
| | Normal | | --- | |
| | 1 | Olen lukenut yllä olevan kuvauksen, saanut riittävät tiedot tutkimuksesta, ja suostun osallistumaan tutkimukseen | | --- | --- | | 2 | En halua osallistua tutkimukseen | |

| | Q002 - VBC: | Multi coded | | --- | --- | |
| --- | --- | --- |
| | Not back | Min = 1 | | --- | |
| | Terveysongelmiin voi hakea apua erilaisilta täydentävien hoitojen ja koululääketieteen ammattilaisilta. Täydentäviä hoitoja tarjotaan yleensä virallisen terveydenhuollon ulkopuolella. Niitä kutsutaan myös vaihtoehto- tai luontaishoidoiksi.  Oletko käynyt yhdellä tai useammalla seuraavista hoitoammattilaisista viimeisen 12 kuukauden aikana? | | --- | |
| | Merkitse kaikki omalla kohdallasi kyseeseen tulevat vaihtoehdot. | | --- | |
| | Rotated | | --- | |
| | 1 | Lääkäri | | --- | --- | | 2 | Kiropraktikko | | 3 | Homeopaatti | | 4 | Akupunktiohoitaja | | 5 | Fytoterapeutti (=kasvilääkintä) | | 6 | Jäsenkorjaaja (kalevalainen tai muu) | | 7 | Kosketus- tai energiahoitaja (esim. Rosen-terapeutti) | | 8 | Vyöhyketerapeutti | | 9 | Aromaterapeutti | | 10 | Hieroja (tavallinen/klassinen) | | 11 | Muu hieroja (esim. fascia-, hermorata- tai lymfahieroja) | | 12 | Naprapaatti | | 13 | Osteopaatti | | 14 | Taideterapeutti (musiikki, tanssi, kuvataide, kirjallisuus) | | 15 | Kuppari | | 16 | Hypnoterapeutti | | 17 | Kiinalaisen lääketieteen hoitaja | | 18 | Antroposofisen lääketieteen terapeutti | | 19 | Ayurvedaterapeutti | | 996 | Jokin muu, mikä? **Open *Fixed* | | 998 | Ei mikään edellä mainituista **Fixed *Exclusive* | | 999 | En osaa/halua sanoa **Fixed *Exclusive* | |

| | Ask only if **Q002 - VBC**,1 | | --- | |
| --- | --- |
| | Q004 - VBF: | Single coded | | --- | --- | |
| | Not back | | --- | |
| | Mikä oli tärkein syy, jonka vuoksi viimeksi menit lääkäriin? | | --- | |
| | Normal | | --- | |
| | 1 | Äkillisesti alkanut vaiva, joka kesti alle kuukauden | | --- | --- | | 2 | Pitkäaikainen terveysongelma (kesto yli kuukauden) tai siihen liittyvä oireiden hoito | | 3 | Hyvinvoinnin lisääminen | | 996 | Muu syy, mikä? **Open *Fixed* | | 999 | En osaa sanoa **Fixed *Exclusive* | |

| | Ask only if **Q002 - VBC**,1 | | --- | |
| --- | --- |
| | Q005 - VBG: | Single coded | | --- | --- | |
| | Not back | | --- | |
| | Kuinka hyödyllistä lääkärillä käyminen oli sinulle? | | --- | |
| | Normal | | --- | |
| | 1 | Erittäin hyödyllistä | | --- | --- | | 2 | Hieman hyödyllistä | | 3 | Ei hyödyllistä | | 999 | En osaa sanoa **Fixed *Exclusive* | |

| | Ask only if **Q002 - VBC**,1 | | --- | |
| --- | --- |
| | Q003 - VBD: | Numeric | | --- | --- | |
| | Not back | Min = 0 | Max = 99 | | --- | |
| | Kuinka monta kertaa olet käynyt lääkärillä viimeisen 3 kuukauden aikana?  Merkitse lukumäärä numeroina tyhjään tilaan. | | --- | |
| |  | | --- | |
| | 999 | En osaa sanoa **Fixed *Exclusive* | | --- | --- | |

| | Ask only if **Q002 - VBC**,2 | | --- | |
| --- | --- |
| | Q007 - VBF_Copy_1: | Single coded | | --- | --- | |
| | Not back | | --- | |
| | Mikä oli tärkein syy, jonka vuoksi menit viimeksi kiropraktikolle? | | --- | |
| | Normal | | --- | |
| | 1 | Äkillisesti alkanut vaiva, joka kesti alle kuukauden | | --- | --- | | 2 | Pitkäaikainen terveysongelma (kesto yli kuukauden) tai siihen liittyvä oireiden hoito | | 3 | Hyvinvoinnin lisääminen | | 996 | Muu syy, mikä? **Open *Fixed* | | 999 | En osaa sanoa **Fixed *Exclusive* | |

| | Ask only if **Q002 - VBC**,2 | | --- | |
| --- | --- |
| | Q008 - VBG_Copy_1: | Single coded | | --- | --- | |
| | Not back | | --- | |
| | Kuinka hyödyllistä kiropraktikolla käyminen oli sinulle? | | --- | |
| | Normal | | --- | |
| | 1 | Erittäin hyödyllistä | | --- | --- | | 2 | Hieman hyödyllistä | | 3 | Ei hyödyllistä | | 999 | En osaa sanoa **Fixed *Exclusive* | |

| | Ask only if **Q002 - VBC**,2 | | --- | |
| --- | --- |
| | Q006 - VBD_Copy_1: | Numeric | | --- | --- | |
| | Not back | Min = 0 | Max = 99 | | --- | |
| | Kuinka monta kertaa olet käynyt kiropraktikolla viimeisen 3 kuukauden aikana?  Merkitse lukumäärä numeroina tyhjään tilaan. | | --- | |
| |  | | --- | |
| | 999 | En osaa sanoa **Fixed *Exclusive* | | --- | --- | |

| | Ask only if **Q002 - VBC**,3 | | --- | |
| --- | --- |
| | Q010 - VBF_Copy_2: | Single coded | | --- | --- | |
| | Not back | | --- | |
| | Mikä oli tärkein syy, jonka vuoksi viimeksi menit homeopaatille? | | --- | |
| | Normal | | --- | |
| | 1 | Äkillisesti alkanut vaiva, joka kesti alle kuukauden | | --- | --- | | 2 | Pitkäaikainen terveysongelma (kesto yli kuukauden) tai siihen liittyvä oireiden hoito | | 3 | Hyvinvoinnin lisääminen | | 996 | Muu syy, mikä? **Open *Fixed* | | 999 | En osaa sanoa **Fixed *Exclusive* | |

| | Ask only if **Q002 - VBC**,3 | | --- | |
| --- | --- |
| | Q011 - VBG_Copy_2: | Single coded | | --- | --- | |
| | Not back | | --- | |
| | Kuinka hyödyllistä homeopaatilla käyminen oli sinulle? | | --- | |
| | Normal | | --- | |
| | 1 | Erittäin hyödyllistä | | --- | --- | | 2 | Hieman hyödyllistä | | 3 | Ei hyödyllistä | | 999 | En osaa sanoa **Fixed *Exclusive* | |

| | Ask only if **Q002 - VBC**,3 | | --- | |
| --- | --- |
| | Q009 - VBD_Copy_2: | Numeric | | --- | --- | |
| | Not back | Min = 0 | Max = 99 | | --- | |
| | Kuinka monta kertaa olet käynyt homeopaatilla viimeisen 3 kuukauden aikana?  Merkitse lukumäärä numeroina tyhjään tilaan. | | --- | |
| |  | | --- | |
| | 999 | En osaa sanoa **Fixed *Exclusive* | | --- | --- | |

| | Ask only if **Q002 - VBC**,4 | | --- | |
| --- | --- |
| | Q013 - VBF_Copy_3: | Single coded | | --- | --- | |
| | Not back | | --- | |
| | Mikä oli tärkein syy, jonka vuoksi viimeksi menit akupunktiohoitajalle? | | --- | |
| | Normal | | --- | |
| | 1 | Äkillisesti alkanut vaiva, joka kesti alle kuukauden | | --- | --- | | 2 | Pitkäaikainen terveysongelma (kesto yli kuukauden) tai siihen liittyvä oireiden hoito | | 3 | Hyvinvoinnin lisääminen | | 996 | Muu syy, mikä? **Open *Fixed* | | 999 | En osaa sanoa **Fixed *Exclusive* | |

| | Ask only if **Q002 - VBC**,4 | | --- | |
| --- | --- |
| | Q014 - VBG_Copy_3: | Single coded | | --- | --- | |
| | Not back | | --- | |
| | Kuinka hyödyllistä akupunktiohoitajalla käyminen oli sinulle? | | --- | |
| | Normal | | --- | |
| | 1 | Erittäin hyödyllistä | | --- | --- | | 2 | Hieman hyödyllistä | | 3 | Ei hyödyllistä | | 999 | En osaa sanoa **Fixed *Exclusive* | |

| | Ask only if **Q002 - VBC**,4 | | --- | |
| --- | --- |
| | Q012 - VBD_Copy_3: | Numeric | | --- | --- | |
| | Not back | Min = 0 | Max = 99 | | --- | |
| | Kuinka monta kertaa olet käynyt akupunktiohoitajalla viimeisen 3 kuukauden aikana?  Merkitse lukumäärä numeroina tyhjään tilaan. | | --- | |
| |  | | --- | |
| | 999 | En osaa sanoa **Fixed *Exclusive* | | --- | --- | |

| | Ask only if **Q002 - VBC**,5 | | --- | |
| --- | --- |
| | Q016 - VBF_Copy_4: | Single coded | | --- | --- | |
| | Not back | | --- | |
| | Mikä oli tärkein syy, jonka vuoksi viimeksi menit fytoterapeutille (=kasvilääkintä)? | | --- | |
| | Normal | | --- | |
| | 1 | Äkillisesti alkanut vaiva, joka kesti alle kuukauden | | --- | --- | | 2 | Pitkäaikainen terveysongelma (kesto yli kuukauden) tai siihen liittyvä oireiden hoito | | 3 | Hyvinvoinnin lisääminen | | 996 | Muu syy, mikä? **Open *Fixed* | | 999 | En osaa sanoa **Fixed *Exclusive* | |

| | Ask only if **Q002 - VBC**,5 | | --- | |
| --- | --- |
| | Q017 - VBG_Copy_4: | Single coded | | --- | --- | |
| | Not back | | --- | |
| | Kuinka hyödyllistä fytoterapeutilla (=kasvilääkintä) käyminen oli sinulle? | | --- | |
| | Normal | | --- | |
| | 1 | Erittäin hyödyllistä | | --- | --- | | 2 | Hieman hyödyllistä | | 3 | Ei hyödyllistä | | 999 | En osaa sanoa **Fixed *Exclusive* | |

| | Ask only if **Q002 - VBC**,5 | | --- | |
| --- | --- |
| | Q015 - VBD_Copy_4: | Numeric | | --- | --- | |
| | Not back | Min = 0 | Max = 99 | | --- | |
| | Kuinka monta kertaa olet käynyt fytoterapeutilla (=kasvilääkintä) viimeisen 3 kuukauden aikana?  Merkitse lukumäärä numeroina tyhjään tilaan. | | --- | |
| |  | | --- | |
| | 999 | En osaa sanoa **Fixed *Exclusive* | | --- | --- | |

| | Ask only if **Q002 - VBC**,6 | | --- | |
| --- | --- |
| | Q019 - VBF_Copy_5: | Single coded | | --- | --- | |
| | Not back | | --- | |
| | Mikä oli tärkein syy, jonka vuoksi viimeksi menit jäsenkorjaajalle (kalevalainen tai muu)? | | --- | |
| | Normal | | --- | |
| | 1 | Äkillisesti alkanut vaiva, joka kesti alle kuukauden | | --- | --- | | 2 | Pitkäaikainen terveysongelma (kesto yli kuukauden) tai siihen liittyvä oireiden hoito | | 3 | Hyvinvoinnin lisääminen | | 996 | Muu syy, mikä? **Open *Fixed* | | 999 | En osaa sanoa **Fixed *Exclusive* | |

| | Ask only if **Q002 - VBC**,6 | | --- | |
| --- | --- |
| | Q020 - VBG_Copy_5: | Single coded | | --- | --- | |
| | Not back | | --- | |
| | Kuinka hyödyllistä jäsenkorjaajalla (kalevalainen tai muu) käyminen oli sinulle? | | --- | |
| | Normal | | --- | |
| | 1 | Erittäin hyödyllistä | | --- | --- | | 2 | Hieman hyödyllistä | | 3 | Ei hyödyllistä | | 999 | En osaa sanoa **Fixed *Exclusive* | |

| | Ask only if **Q002 - VBC**,6 | | --- | |
| --- | --- |
| | Q018 - VBD_Copy_5: | Numeric | | --- | --- | |
| | Not back | Min = 0 | Max = 99 | | --- | |
| | Kuinka monta kertaa olet käynyt jäsenkorjaajalla (kalevalainen tai muu) viimeisen 3 kuukauden aikana?  Merkitse lukumäärä numeroina tyhjään tilaan. | | --- | |
| |  | | --- | |
| | 999 | En osaa sanoa **Fixed *Exclusive* | | --- | --- | |

| | Ask only if **Q002 - VBC**,7 | | --- | |
| --- | --- |
| | Q022 - VBF_Copy_6: | Single coded | | --- | --- | |
| | Not back | | --- | |
| | Mikä oli tärkein syy, jonka vuoksi viimeksi menit kosketus- tai energiahoitajalle (esim. Rosen-terapeutti)? | | --- | |
| | Normal | | --- | |
| | 1 | Äkillisesti alkanut vaiva, joka kesti alle kuukauden | | --- | --- | | 2 | Pitkäaikainen terveysongelma (kesto yli kuukauden) tai siihen liittyvä oireiden hoito | | 3 | Hyvinvoinnin lisääminen | | 996 | Muu syy, mikä? **Open *Fixed* | | 999 | En osaa sanoa **Fixed *Exclusive* | |

| | Ask only if **Q002 - VBC**,7 | | --- | |
| --- | --- |
| | Q023 - VBG_Copy_6: | Single coded | | --- | --- | |
| | Not back | | --- | |
| | Kuinka hyödyllistä kosketus- tai energiahoitajalla (esim. Rosen-terapeutti) käyminen oli sinulle? | | --- | |
| | Normal | | --- | |
| | 1 | Erittäin hyödyllistä | | --- | --- | | 2 | Hieman hyödyllistä | | 3 | Ei hyödyllistä | | 999 | En osaa sanoa **Fixed *Exclusive* | |

| | Ask only if **Q002 - VBC**,7 | | --- | |
| --- | --- |
| | Q021 - VBD_Copy_6: | Numeric | | --- | --- | |
| | Not back | Min = 0 | Max = 99 | | --- | |
| | Kuinka monta kertaa olet käynyt kosketus- tai energiahoitajalla (esim. Rosen-terapeutti) viimeisen 3 kuukauden aikana?  Merkitse lukumäärä numeroina tyhjään tilaan. | | --- | |
| |  | | --- | |
| | 999 | En osaa sanoa **Fixed *Exclusive* | | --- | --- | |

| | Ask only if **Q002 - VBC**,8 | | --- | |
| --- | --- |
| | Q025 - VBF_Copy_7: | Single coded | | --- | --- | |
| | Not back | | --- | |
| | Mikä oli tärkein syy, jonka vuoksi viimeksi menit vyöhyketerapeutille? | | --- | |
| | Normal | | --- | |
| | 1 | Äkillisesti alkanut vaiva, joka kesti alle kuukauden | | --- | --- | | 2 | Pitkäaikainen terveysongelma (kesto yli kuukauden) tai siihen liittyvä oireiden hoito | | 3 | Hyvinvoinnin lisääminen | | 996 | Muu syy, mikä? **Open *Fixed* | | 999 | En osaa sanoa **Fixed *Exclusive* | |

| | Ask only if **Q002 - VBC**,8 | | --- | |
| --- | --- |
| | Q026 - VBG_Copy_7: | Single coded | | --- | --- | |
| | Not back | | --- | |
| | Kuinka hyödyllistä vyöhyketerapeutilla käyminen oli sinulle? | | --- | |
| | Normal | | --- | |
| | 1 | Erittäin hyödyllistä | | --- | --- | | 2 | Hieman hyödyllistä | | 3 | Ei hyödyllistä | | 999 | En osaa sanoa **Fixed *Exclusive* | |

| | Ask only if **Q002 - VBC**,8 | | --- | |
| --- | --- |
| | Q024 - VBD_Copy_7: | Numeric | | --- | --- | |
| | Not back | Min = 0 | Max = 99 | | --- | |
| | Kuinka monta kertaa olet käynyt vyöhyketerapeutilla viimeisen 3 kuukauden aikana?  Merkitse lukumäärä numeroina tyhjään tilaan. | | --- | |
| |  | | --- | |
| | 999 | En osaa sanoa **Fixed *Exclusive* | | --- | --- | |

| | Ask only if **Q002 - VBC**,9 | | --- | |
| --- | --- |
| | Q028 - VBF_Copy_8: | Single coded | | --- | --- | |
| | Not back | | --- | |
| | Mikä oli tärkein syy, jonka vuoksi viimeksi menit aromaterapeutille? | | --- | |
| | Normal | | --- | |
| | 1 | Äkillisesti alkanut vaiva, joka kesti alle kuukauden | | --- | --- | | 2 | Pitkäaikainen terveysongelma (kesto yli kuukauden) tai siihen liittyvä oireiden hoito | | 3 | Hyvinvoinnin lisääminen | | 996 | Muu syy, mikä? **Open *Fixed* | | 999 | En osaa sanoa **Fixed *Exclusive* | |

| | Ask only if **Q002 - VBC**,9 | | --- | |
| --- | --- |
| | Q029 - VBG_Copy_8: | Single coded | | --- | --- | |
| | Not back | | --- | |
| | Kuinka hyödyllistä aromaterapeutilla käyminen oli sinulle? | | --- | |
| | Normal | | --- | |
| | 1 | Erittäin hyödyllistä | | --- | --- | | 2 | Hieman hyödyllistä | | 3 | Ei hyödyllistä | | 999 | En osaa sanoa **Fixed *Exclusive* | |

| | Ask only if **Q002 - VBC**,9 | | --- | |
| --- | --- |
| | Q027 - VBD_Copy_8: | Numeric | | --- | --- | |
| | Not back | Min = 0 | Max = 99 | | --- | |
| | Kuinka monta kertaa olet käynyt aromaterapeutilla viimeisen 3 kuukauden aikana?  Merkitse lukumäärä numeroina tyhjään tilaan. | | --- | |
| |  | | --- | |
| | 999 | En osaa sanoa **Fixed *Exclusive* | | --- | --- | |

| | Ask only if **Q002 - VBC**,10 | | --- | |
| --- | --- |
| | Q031 - VBF_Copy_9: | Single coded | | --- | --- | |
| | Not back | | --- | |
| | Mikä oli tärkein syy, jonka vuoksi viimeksi menit hierojalle (tavallinen/klassinen)? | | --- | |
| | Normal | | --- | |
| | 1 | Äkillisesti alkanut vaiva, joka kesti alle kuukauden | | --- | --- | | 2 | Pitkäaikainen terveysongelma (kesto yli kuukauden) tai siihen liittyvä oireiden hoito | | 3 | Hyvinvoinnin lisääminen | | 996 | Muu syy, mikä? **Open *Fixed* | | 999 | En osaa sanoa **Fixed *Exclusive* | |

| | Ask only if **Q002 - VBC**,10 | | --- | |
| --- | --- |
| | Q032 - VBG_Copy_9: | Single coded | | --- | --- | |
| | Not back | | --- | |
| | Kuinka hyödyllistä hierojalla (tavallinen/klassinen) käyminen oli sinulle? | | --- | |
| | Normal | | --- | |
| | 1 | Erittäin hyödyllistä | | --- | --- | | 2 | Hieman hyödyllistä | | 3 | Ei hyödyllistä | | 999 | En osaa sanoa **Fixed *Exclusive* | |

| | Ask only if **Q002 - VBC**,10 | | --- | |
| --- | --- |
| | Q030 - VBD_Copy_9: | Numeric | | --- | --- | |
| | Not back | Min = 0 | Max = 99 | | --- | |
| | Kuinka monta kertaa olet käynyt hierojalla (tavallinen/klassinen) viimeisen 3 kuukauden aikana?  Merkitse lukumäärä numeroina tyhjään tilaan. | | --- | |
| |  | | --- | |
| | 999 | En osaa sanoa **Fixed *Exclusive* | | --- | --- | |

| | Ask only if **Q002 - VBC**,11 | | --- | |
| --- | --- |
| | Q034 - VBF_Copy_10: | Single coded | | --- | --- | |
| | Not back | | --- | |
| | Mikä oli tärkein syy, jonka vuoksi viimeksi menit muulle hierojalle (esim. fascia-, hermorata- tai lymfahieroja)? | | --- | |
| | Normal | | --- | |
| | 1 | Äkillisesti alkanut vaiva, joka kesti alle kuukauden | | --- | --- | | 2 | Pitkäaikainen terveysongelma (kesto yli kuukauden) tai siihen liittyvä oireiden hoito | | 3 | Hyvinvoinnin lisääminen | | 996 | Muu syy, mikä? **Open *Fixed* | | 999 | En osaa sanoa **Fixed *Exclusive* | |

| | Ask only if **Q002 - VBC**,11 | | --- | |
| --- | --- |
| | Q035 - VBG_Copy_10: | Single coded | | --- | --- | |
| | Not back | | --- | |
| | Kuinka hyödyllistä muulla hierojalla (esim. fascia-, hermorata- tai lymfahieroja) käyminen oli sinulle? | | --- | |
| | Normal | | --- | |
| | 1 | Erittäin hyödyllistä | | --- | --- | | 2 | Hieman hyödyllistä | | 3 | Ei hyödyllistä | | 999 | En osaa sanoa **Fixed *Exclusive* | |

| | Ask only if **Q002 - VBC**,11 | | --- | |
| --- | --- |
| | Q033 - VBD_Copy_10: | Numeric | | --- | --- | |
| | Not back | Min = 0 | Max = 99 | | --- | |
| | Kuinka monta kertaa olet käynyt muulla hierojalla (esim. fascia-, hermorata- tai lymfahieroja) viimeisen 3 kuukauden aikana?  Merkitse lukumäärä numeroina tyhjään tilaan. | | --- | |
| |  | | --- | |
| | 999 | En osaa sanoa **Fixed *Exclusive* | | --- | --- | |

| | Ask only if **Q002 - VBC**,12 | | --- | |
| --- | --- |
| | Q037 - VBF_Copy_11: | Single coded | | --- | --- | |
| | Not back | | --- | |
| | Mikä oli tärkein syy, jonka vuoksi viimeksi menit naprapaatille? | | --- | |
| | Normal | | --- | |
| | 1 | Äkillisesti alkanut vaiva, joka kesti alle kuukauden | | --- | --- | | 2 | Pitkäaikainen terveysongelma (kesto yli kuukauden) tai siihen liittyvä oireiden hoito | | 3 | Hyvinvoinnin lisääminen | | 996 | Muu syy, mikä? **Open *Fixed* | | 999 | En osaa sanoa **Fixed *Exclusive* | |

| | Ask only if **Q002 - VBC**,12 | | --- | |
| --- | --- |
| | Q038 - VBG_Copy_11: | Single coded | | --- | --- | |
| | Not back | | --- | |
| | Kuinka hyödyllistä naprapaatilla käyminen oli sinulle? | | --- | |
| | Normal | | --- | |
| | 1 | Erittäin hyödyllistä | | --- | --- | | 2 | Hieman hyödyllistä | | 3 | Ei hyödyllistä | | 999 | En osaa sanoa **Fixed *Exclusive* | |

| | Ask only if **Q002 - VBC**,12 | | --- | |
| --- | --- |
| | Q036 - VBD_Copy_11: | Numeric | | --- | --- | |
| | Not back | Min = 0 | Max = 99 | | --- | |
| | Kuinka monta kertaa olet käynyt naprapaatilla viimeisen 3 kuukauden aikana?  Merkitse lukumäärä numeroina tyhjään tilaan. | | --- | |
| |  | | --- | |
| | 999 | En osaa sanoa **Fixed *Exclusive* | | --- | --- | |

| | Ask only if **Q002 - VBC**,13 | | --- | |
| --- | --- |
| | Q040 - VBF_Copy_12: | Single coded | | --- | --- | |
| | Not back | | --- | |
| | Mikä oli tärkein syy, jonka vuoksi viimeksi menit osteopaatille? | | --- | |
| | Normal | | --- | |
| | 1 | Äkillisesti alkanut vaiva, joka kesti alle kuukauden | | --- | --- | | 2 | Pitkäaikainen terveysongelma (kesto yli kuukauden) tai siihen liittyvä oireiden hoito | | 3 | Hyvinvoinnin lisääminen | | 996 | Muu syy, mikä? **Open *Fixed* | | 999 | En osaa sanoa **Fixed *Exclusive* | |

| | Ask only if **Q002 - VBC**,13 | | --- | |
| --- | --- |
| | Q041 - VBG_Copy_12: | Single coded | | --- | --- | |
| | Not back | | --- | |
| | Kuinka hyödyllistä osteopaatilla käyminen oli sinulle? | | --- | |
| | Normal | | --- | |
| | 1 | Erittäin hyödyllistä | | --- | --- | | 2 | Hieman hyödyllistä | | 3 | Ei hyödyllistä | | 999 | En osaa sanoa **Fixed *Exclusive* | |

| | Ask only if **Q002 - VBC**,13 | | --- | |
| --- | --- |
| | Q039 - VBD_Copy_12: | Numeric | | --- | --- | |
| | Not back | Min = 0 | Max = 99 | | --- | |
| | Kuinka monta kertaa olet käynyt osteopaatilla viimeisen 3 kuukauden aikana?  Merkitse lukumäärä numeroina tyhjään tilaan. | | --- | |
| |  | | --- | |
| | 999 | En osaa sanoa **Fixed *Exclusive* | | --- | --- | |

| | Ask only if **Q002 - VBC**,14 | | --- | |
| --- | --- |
| | Q043 - VBF_Copy_13: | Single coded | | --- | --- | |
| | Not back | | --- | |
| | Mikä oli tärkein syy, jonka vuoksi viimeksi menit taideterapeutille (musiikki, tanssi, kuvataide, kirjallisuus)? | | --- | |
| | Normal | | --- | |
| | 1 | Äkillisesti alkanut vaiva, joka kesti alle kuukauden | | --- | --- | | 2 | Pitkäaikainen terveysongelma (kesto yli kuukauden) tai siihen liittyvä oireiden hoito | | 3 | Hyvinvoinnin lisääminen | | 996 | Muu syy, mikä? **Open *Fixed* | | 999 | En osaa sanoa **Fixed *Exclusive* | |

| | Ask only if **Q002 - VBC**,14 | | --- | |
| --- | --- |
| | Q044 - VBG_Copy_13: | Single coded | | --- | --- | |
| | Not back | | --- | |
| | Kuinka hyödyllistä taideterapeutilla (musiikki, tanssi, kuvataide, kirjallisuus) käyminen oli sinulle? | | --- | |
| | Normal | | --- | |
| | 1 | Erittäin hyödyllistä | | --- | --- | | 2 | Hieman hyödyllistä | | 3 | Ei hyödyllistä | | 999 | En osaa sanoa **Fixed *Exclusive* | |

| | Ask only if **Q002 - VBC**,14 | | --- | |
| --- | --- |
| | Q042 - VBD_Copy_13: | Numeric | | --- | --- | |
| | Not back | Min = 0 | Max = 99 | | --- | |
| | Kuinka monta kertaa olet käynyt taideterapeutilla (musiikki, tanssi, kuvataide, kirjallisuus) viimeisen 3 kuukauden aikana?  Merkitse lukumäärä numeroina tyhjään tilaan. | | --- | |
| |  | | --- | |
| | 999 | En osaa sanoa **Fixed *Exclusive* | | --- | --- | |

| | Ask only if **Q002 - VBC**,15 | | --- | |
| --- | --- |
| | Q046 - VBF_Copy_14: | Single coded | | --- | --- | |
| | Not back | | --- | |
| | Mikä oli tärkein syy, jonka vuoksi viimeksi menit kupparille? | | --- | |
| | Normal | | --- | |
| | 1 | Äkillisesti alkanut vaiva, joka kesti alle kuukauden | | --- | --- | | 2 | Pitkäaikainen terveysongelma (kesto yli kuukauden) tai siihen liittyvä oireiden hoito | | 3 | Hyvinvoinnin lisääminen | | 996 | Muu syy, mikä? **Open *Fixed* | | 999 | En osaa sanoa **Fixed *Exclusive* | |

| | Ask only if **Q002 - VBC**,15 | | --- | |
| --- | --- |
| | Q047 - VBG_Copy_14: | Single coded | | --- | --- | |
| | Not back | | --- | |
| | Kuinka hyödyllistä kupparilla käyminen oli sinulle? | | --- | |
| | Normal | | --- | |
| | 1 | Erittäin hyödyllistä | | --- | --- | | 2 | Hieman hyödyllistä | | 3 | Ei hyödyllistä | | 999 | En osaa sanoa **Fixed *Exclusive* | |

| | Ask only if **Q002 - VBC**,15 | | --- | |
| --- | --- |
| | Q045 - VBD_Copy_14: | Numeric | | --- | --- | |
| | Not back | Min = 0 | Max = 99 | | --- | |
| | Kuinka monta kertaa olet käynyt kupparilla viimeisen 3 kuukauden aikana?  Merkitse lukumäärä numeroina tyhjään tilaan. | | --- | |
| |  | | --- | |
| | 999 | En osaa sanoa **Fixed *Exclusive* | | --- | --- | |

| | Ask only if **Q002 - VBC**,16 | | --- | |
| --- | --- |
| | Q049 - VBF_Copy_15: | Single coded | | --- | --- | |
| | Not back | | --- | |
| | Mikä oli tärkein syy, jonka vuoksi viimeksi menit hypnoterapeutille? | | --- | |
| | Normal | | --- | |
| | 1 | Äkillisesti alkanut vaiva, joka kesti alle kuukauden | | --- | --- | | 2 | Pitkäaikainen terveysongelma (kesto yli kuukauden) tai siihen liittyvä oireiden hoito | | 3 | Hyvinvoinnin lisääminen | | 996 | Muu syy, mikä? **Open *Fixed* | | 999 | En osaa sanoa **Fixed *Exclusive* | |

| | Ask only if **Q002 - VBC**,16 | | --- | |
| --- | --- |
| | Q050 - VBG_Copy_15: | Single coded | | --- | --- | |
| | Not back | | --- | |
| | Kuinka hyödyllistä hypnoterapeutilla käyminen oli sinulle? | | --- | |
| | Normal | | --- | |
| | 1 | Erittäin hyödyllistä | | --- | --- | | 2 | Hieman hyödyllistä | | 3 | Ei hyödyllistä | | 999 | En osaa sanoa **Fixed *Exclusive* | |

| | Ask only if **Q002 - VBC**,16 | | --- | |
| --- | --- |
| | Q048 - VBD_Copy_15: | Numeric | | --- | --- | |
| | Not back | Min = 0 | Max = 99 | | --- | |
| | Kuinka monta kertaa olet käynyt hypnoterapeutilla viimeisen 3 kuukauden aikana?  Merkitse lukumäärä numeroina tyhjään tilaan. | | --- | |
| |  | | --- | |
| | 999 | En osaa sanoa **Fixed *Exclusive* | | --- | --- | |

| | Ask only if **Q002 - VBC**,17 | | --- | |
| --- | --- |
| | Q052 - VBF_Copy_16: | Single coded | | --- | --- | |
| | Not back | | --- | |
| | Mikä oli tärkein syy, jonka vuoksi viimeksi menit kiinalaisen lääketieteen hoitajalle? | | --- | |
| | Normal | | --- | |
| | 1 | Äkillisesti alkanut vaiva, joka kesti alle kuukauden | | --- | --- | | 2 | Pitkäaikainen terveysongelma (kesto yli kuukauden) tai siihen liittyvä oireiden hoito | | 3 | Hyvinvoinnin lisääminen | | 996 | Muu syy, mikä? **Open *Fixed* | | 999 | En osaa sanoa **Fixed *Exclusive* | |

| | Ask only if **Q002 - VBC**,17 | | --- | |
| --- | --- |
| | Q053 - VBG_Copy_16: | Single coded | | --- | --- | |
| | Not back | | --- | |
| | Kuinka hyödyllistä kiinalaisen lääketieteen hoitajalla käyminen oli sinulle? | | --- | |
| | Normal | | --- | |
| | 1 | Erittäin hyödyllistä | | --- | --- | | 2 | Hieman hyödyllistä | | 3 | Ei hyödyllistä | | 999 | En osaa sanoa **Fixed *Exclusive* | |

| | Ask only if **Q002 - VBC**,17 | | --- | |
| --- | --- |
| | Q051 - VBD_Copy_16: | Numeric | | --- | --- | |
| | Not back | Min = 0 | Max = 99 | | --- | |
| | Kuinka monta kertaa olet käynyt kiinalaisen lääketieteen hoitajalla viimeisen 3 kuukauden aikana?  Merkitse lukumäärä numeroina tyhjään tilaan. | | --- | |
| |  | | --- | |
| | 999 | En osaa sanoa **Fixed *Exclusive* | | --- | --- | |

| | Ask only if **Q002 - VBC**,18 | | --- | |
| --- | --- |
| | Q055 - VBF_Copy_17: | Single coded | | --- | --- | |
| | Not back | | --- | |
| | Mikä oli tärkein syy, jonka vuoksi viimeksi menit antroposofisen lääketieteen terapeutille? | | --- | |
| | Normal | | --- | |
| | 1 | Äkillisesti alkanut vaiva, joka kesti alle kuukauden | | --- | --- | | 2 | Pitkäaikainen terveysongelma (kesto yli kuukauden) tai siihen liittyvä oireiden hoito | | 3 | Hyvinvoinnin lisääminen | | 996 | Muu syy, mikä? **Open *Fixed* | | 999 | En osaa sanoa **Fixed *Exclusive* | |

| | Ask only if **Q002 - VBC**,18 | | --- | |
| --- | --- |
| | Q056 - VBG_Copy_17: | Single coded | | --- | --- | |
| | Not back | | --- | |
| | Kuinka hyödyllistä antroposofisen lääketieteen terapeutilla käyminen oli sinulle? | | --- | |
| | Normal | | --- | |
| | 1 | Erittäin hyödyllistä | | --- | --- | | 2 | Hieman hyödyllistä | | 3 | Ei hyödyllistä | | 999 | En osaa sanoa **Fixed *Exclusive* | |

| | Ask only if **Q002 - VBC**,18 | | --- | |
| --- | --- |
| | Q054 - VBD_Copy_17: | Numeric | | --- | --- | |
| | Not back | Min = 0 | Max = 99 | | --- | |
| | Kuinka monta kertaa olet käynyt antroposofisen lääketieteen terapeutilla viimeisen 3 kuukauden aikana?  Merkitse lukumäärä numeroina tyhjään tilaan. | | --- | |
| |  | | --- | |
| | 999 | En osaa sanoa **Fixed *Exclusive* | | --- | --- | |

| | Ask only if **Q002 - VBC**,19 | | --- | |
| --- | --- |
| | Q058 - VBF_Copy_18: | Single coded | | --- | --- | |
| | Not back | | --- | |
| | Mikä oli tärkein syy, jonka vuoksi viimeksi menit ayurvedaterapeutille? | | --- | |
| | Normal | | --- | |
| | 1 | Äkillisesti alkanut vaiva, joka kesti alle kuukauden | | --- | --- | | 2 | Pitkäaikainen terveysongelma (kesto yli kuukauden) tai siihen liittyvä oireiden hoito | | 3 | Hyvinvoinnin lisääminen | | 996 | Muu syy, mikä? **Open *Fixed* | | 999 | En osaa sanoa **Fixed *Exclusive* | |

| | Ask only if **Q002 - VBC**,19 | | --- | |
| --- | --- |
| | Q059 - VBG_Copy_18: | Single coded | | --- | --- | |
| | Not back | | --- | |
| | Kuinka hyödyllistä ayurvedaterapeutilla käyminen oli sinulle? | | --- | |
| | Normal | | --- | |
| | 1 | Erittäin hyödyllistä | | --- | --- | | 2 | Hieman hyödyllistä | | 3 | Ei hyödyllistä | | 999 | En osaa sanoa **Fixed *Exclusive* | |

| | Ask only if **Q002 - VBC**,19 | | --- | |
| --- | --- |
| | Q057 - VBD_Copy_18: | Numeric | | --- | --- | |
| | Not back | Min = 0 | Max = 99 | | --- | |
| | Kuinka monta kertaa olet käynyt ayurvedaterapeutilla viimeisen 3 kuukauden aikana?  Merkitse lukumäärä numeroina tyhjään tilaan. | | --- | |
| |  | | --- | |
| | 999 | En osaa sanoa **Fixed *Exclusive* | | --- | --- | |

| | Ask only if **Q002 - VBC**,996 | | --- | |
| --- | --- |
| | Q061 - VBF_Copy_19: | Single coded | | --- | --- | |
| | Not back | | --- | |
| | Mikä oli tärkein syy, jonka vuoksi viimeksi menit muulle hoitoammattilaiselle? | | --- | |
| | Normal | | --- | |
| | 1 | Äkillisesti alkanut vaiva, joka kesti alle kuukauden | | --- | --- | | 2 | Pitkäaikainen terveysongelma (kesto yli kuukauden) tai siihen liittyvä oireiden hoito | | 3 | Hyvinvoinnin lisääminen | | 996 | Muu syy, mikä? **Open *Fixed* | | 999 | En osaa sanoa **Fixed *Exclusive* | |

| | Ask only if **Q002 - VBC**,996 | | --- | |
| --- | --- |
| | Q062 - VBG_Copy_19: | Single coded | | --- | --- | |
| | Not back | | --- | |
| | Kuinka hyödyllistä muulla hoitoammattilaisella käyminen oli sinulle? | | --- | |
| | Normal | | --- | |
| | 1 | Erittäin hyödyllistä | | --- | --- | | 2 | Hieman hyödyllistä | | 3 | Ei hyödyllistä | | 999 | En osaa sanoa **Fixed *Exclusive* | |

| | Ask only if **Q002 - VBC**,996 | | --- | |
| --- | --- |
| | Q060 - VBD_Copy_19: | Numeric | | --- | --- | |
| | Not back | Min = 0 | Max = 99 | | --- | |
| | Kuinka monta kertaa olet käynyt muulla hoitoammattilaisella viimeisen 3 kuukauden aikana?  Merkitse lukumäärä numeroina tyhjään tilaan. | | --- | |
| |  | | --- | |
| | 999 | En osaa sanoa **Fixed *Exclusive* | | --- | --- | |

| | Q067 - VBM: | Multi coded | | --- | --- | |
| --- | --- | --- |
| | Not back | Min = 1 | | --- | |
| | Mitä alla luetelluista luontaistuotteista olet käyttänyt viimeisten 12 kuukauden aikana? | | --- | |
| | Normal | | --- | |
| | 1 | Vitamiinit ja hivenaineet | | --- | --- | | 2 | Muut ravintolisät | | 3 | Rohdosvalmisteet | | 4 | Homeopaattiset ja antroposofiset valmisteet | | 5 | Muut | | 998 | En ole käyttänyt luontaistuotteita **Fixed *Exclusive* | | 999 | En osaa/halua sanoa **Fixed *Exclusive* | |

|  |
| --- |
|  |
|  |
|  |
|  |

| | Q069 - VBP: | Multi coded | | --- | --- | |
| --- | --- | --- |
| | Not back | Min = 1 | | --- | |
| | Oletko käyttänyt joitakin täydentäviä ja vaihtoehtoisia itseavun keinoja?  Merkitse alla olevista kaikki ne itseavun keinot, joita olet käyttänyt viimeisten 12 kk:n aikana. | | --- | |
| | Rotated | | --- | |
| | 1 | Meditaatio/mindfulness | | --- | --- | | 2 | Jooga | | 3 | Tai Chi tai Qigong | | 4 | Rentoutusmenetelmä | | 5 | Mielikuvaharjoittelu | | 6 | Osallistuminen hoitoseremoniaan, retriittiin tai ryhmätapahtumaan | | 7 | Rukoileminen oman terveyden puolesta | | 8 | Sauna | | 9 | NLP (neurolingvistinen ohjelmointi) | | 10 | Taide (musiikki, tanssi , kirjallisuus, kuvataide) | | 11 | Luonto | | 996 | Muu, mikä? **Open *Fixed* | | 998 | Ei mikään edellä mainituista **Fixed *Exclusive* | | 999 | En osaa/halua sanoa **Fixed *Exclusive* | |

| | Ask only if **Q069 - VBP**,1 | | --- | |
| --- | --- |
| | Q071 - VBF_Copy_20: | Single coded | | --- | --- | |
| | Not back | | --- | |
| | Mikä oli tärkein syy, jonka vuoksi viimeksi meditoit/teit mindfulness-harjoitteita? | | --- | |
| | Normal | | --- | |
| | 1 | Äkillisesti alkanut vaiva, joka kesti alle kuukauden | | --- | --- | | 2 | Pitkäaikainen terveysongelma (kesto yli kuukauden) tai siihen liittyvä oireiden hoito | | 3 | Hyvinvoinnin lisääminen | | 996 | Muu syy, mikä? **Open *Fixed* | | 999 | En osaa sanoa **Fixed *Exclusive* | |

| | Ask only if **Q069 - VBP**,1 | | --- | |
| --- | --- |
| | Q072 - VBG_Copy_20: | Single coded | | --- | --- | |
| | Not back | | --- | |
| | Kuinka hyödyllistä meditoiminen/mindfulness-harjoitteiden tekeminen oli sinulle? | | --- | |
| | Normal | | --- | |
| | 1 | Erittäin hyödyllistä | | --- | --- | | 2 | Hieman hyödyllistä | | 3 | Ei hyödyllistä | | 999 | En osaa sanoa **Fixed *Exclusive* | |

| | Ask only if **Q069 - VBP**,1 | | --- | |
| --- | --- |
| | Q070 - VBD_Copy_20: | Numeric | | --- | --- | |
| | Not back | Min = 0 | Max = 900 | | --- | |
| | Kuinka monta kertaa olet meditoinut/tehnyt mindfulness-harjoitteita viimeisen 3 kuukauden aikana?  Merkitse lukumäärä numeroina tyhjään tilaan. | | --- | |
| |  | | --- | |
| | 999 | En osaa sanoa **Fixed *Exclusive* | | --- | --- | |

| | Ask only if **Q069 - VBP**,2 | | --- | |
| --- | --- |
| | Q074 - VBF_Copy_21: | Single coded | | --- | --- | |
| | Not back | | --- | |
| | Mikä oli tärkein syy, jonka vuoksi viimeksi joogasit? | | --- | |
| | Normal | | --- | |
| | 1 | Äkillisesti alkanut vaiva, joka kesti alle kuukauden | | --- | --- | | 2 | Pitkäaikainen terveysongelma (kesto yli kuukauden) tai siihen liittyvä oireiden hoito | | 3 | Hyvinvoinnin lisääminen | | 996 | Muu syy, mikä? **Open *Fixed* | | 999 | En osaa sanoa **Fixed *Exclusive* | |

| | Ask only if **Q069 - VBP**,2 | | --- | |
| --- | --- |
| | Q075 - VBG_Copy_21: | Single coded | | --- | --- | |
| | Not back | | --- | |
| | Kuinka hyödyllistä joogaaminen oli sinulle? | | --- | |
| | Normal | | --- | |
| | 1 | Erittäin hyödyllistä | | --- | --- | | 2 | Hieman hyödyllistä | | 3 | Ei hyödyllistä | | 999 | En osaa sanoa **Fixed *Exclusive* | |

| | Ask only if **Q069 - VBP**,2 | | --- | |
| --- | --- |
| | Q073 - VBD_Copy_21: | Numeric | | --- | --- | |
| | Not back | Min = 0 | Max = 900 | | --- | |
| | Kuinka monta kertaa olet joogannut viimeisen 3 kuukauden aikana?  Merkitse lukumäärä numeroina tyhjään tilaan. | | --- | |
| |  | | --- | |
| | 999 | En osaa sanoa **Fixed *Exclusive* | | --- | --- | |

| | Ask only if **Q069 - VBP**,3 | | --- | |
| --- | --- |
| | Q077 - VBF_Copy_22: | Single coded | | --- | --- | |
| | Not back | | --- | |
| | Mikä oli tärkein syy, jonka vuoksi viimeksi teit Tai Chi- tai Qigong-harjoitteita? | | --- | |
| | Normal | | --- | |
| | 1 | Äkillisesti alkanut vaiva, joka kesti alle kuukauden | | --- | --- | | 2 | Pitkäaikainen terveysongelma (kesto yli kuukauden) tai siihen liittyvä oireiden hoito | | 3 | Hyvinvoinnin lisääminen | | 996 | Muu syy, mikä? **Open *Fixed* | | 999 | En osaa sanoa **Fixed *Exclusive* | |

| | Ask only if **Q069 - VBP**,3 | | --- | |
| --- | --- |
| | Q078 - VBG_Copy_22: | Single coded | | --- | --- | |
| | Not back | | --- | |
| | Kuinka hyödyllistä Tai Chi- tai Qigong-harjoitteiden tekeminen oli sinulle? | | --- | |
| | Normal | | --- | |
| | 1 | Erittäin hyödyllistä | | --- | --- | | 2 | Hieman hyödyllistä | | 3 | Ei hyödyllistä | | 999 | En osaa sanoa **Fixed *Exclusive* | |

| | Ask only if **Q069 - VBP**,3 | | --- | |
| --- | --- |
| | Q076 - VBD_Copy_22: | Numeric | | --- | --- | |
| | Not back | Min = 0 | Max = 900 | | --- | |
| | Kuinka monta kertaa olet tehnyt Tai Chi- tai Qigong-harjoitteita viimeisen 3 kuukauden aikana?  Merkitse lukumäärä numeroina tyhjään tilaan. | | --- | |
| |  | | --- | |
| | 999 | En osaa sanoa **Fixed *Exclusive* | | --- | --- | |

| | Ask only if **Q069 - VBP**,4 | | --- | |
| --- | --- |
| | Q080 - VBF_Copy_23: | Single coded | | --- | --- | |
| | Not back | | --- | |
| | Mikä oli tärkein syy, jonka vuoksi viimeksi käytit rentoutusmenetelmää? | | --- | |
| | Normal | | --- | |
| | 1 | Äkillisesti alkanut vaiva, joka kesti alle kuukauden | | --- | --- | | 2 | Pitkäaikainen terveysongelma (kesto yli kuukauden) tai siihen liittyvä oireiden hoito | | 3 | Hyvinvoinnin lisääminen | | 996 | Muu syy, mikä? **Open *Fixed* | | 999 | En osaa sanoa **Fixed *Exclusive* | |

| | Ask only if **Q069 - VBP**,4 | | --- | |
| --- | --- |
| | Q081 - VBG_Copy_23: | Single coded | | --- | --- | |
| | Not back | | --- | |
| | Kuinka hyödyllistä rentoutusmenetelmän käyttäminen oli sinulle? | | --- | |
| | Normal | | --- | |
| | 1 | Erittäin hyödyllistä | | --- | --- | | 2 | Hieman hyödyllistä | | 3 | Ei hyödyllistä | | 999 | En osaa sanoa **Fixed *Exclusive* | |

| | Ask only if **Q069 - VBP**,4 | | --- | |
| --- | --- |
| | Q079 - VBD_Copy_23: | Numeric | | --- | --- | |
| | Not back | Min = 0 | Max = 900 | | --- | |
| | Kuinka monta kertaa olet käyttänyt rentoutusmenetelmää viimeisen 3 kuukauden aikana?  Merkitse lukumäärä numeroina tyhjään tilaan. | | --- | |
| |  | | --- | |
| | 999 | En osaa sanoa **Fixed *Exclusive* | | --- | --- | |

| | Ask only if **Q069 - VBP**,5 | | --- | |
| --- | --- |
| | Q083 - VBF_Copy_24: | Single coded | | --- | --- | |
| | Not back | | --- | |
| | Mikä oli tärkein syy, jonka vuoksi viimeksi teit mielikuvaharjoitteita? | | --- | |
| | Normal | | --- | |
| | 1 | Äkillisesti alkanut vaiva, joka kesti alle kuukauden | | --- | --- | | 2 | Pitkäaikainen terveysongelma (kesto yli kuukauden) tai siihen liittyvä oireiden hoito | | 3 | Hyvinvoinnin lisääminen | | 996 | Muu syy, mikä? **Open *Fixed* | | 999 | En osaa sanoa **Fixed *Exclusive* | |

| | Ask only if **Q069 - VBP**,5 | | --- | |
| --- | --- |
| | Q084 - VBG_Copy_24: | Single coded | | --- | --- | |
| | Not back | | --- | |
| | Kuinka hyödyllistä mielikuvaharjoitteiden tekeminen oli sinulle? | | --- | |
| | Normal | | --- | |
| | 1 | Erittäin hyödyllistä | | --- | --- | | 2 | Hieman hyödyllistä | | 3 | Ei hyödyllistä | | 999 | En osaa sanoa **Fixed *Exclusive* | |

| | Ask only if **Q069 - VBP**,5 | | --- | |
| --- | --- |
| | Q082 - VBD_Copy_24: | Numeric | | --- | --- | |
| | Not back | Min = 0 | Max = 900 | | --- | |
| | Kuinka monta kertaa olet tehnyt mielikuvaharjoitteita viimeisen 3 kuukauden aikana?  Merkitse lukumäärä numeroina tyhjään tilaan. | | --- | |
| |  | | --- | |
| | 999 | En osaa sanoa **Fixed *Exclusive* | | --- | --- | |

| | Ask only if **Q069 - VBP**,6 | | --- | |
| --- | --- |
| | Q086 - VBF_Copy_25: | Single coded | | --- | --- | |
| | Not back | | --- | |
| | Mikä oli tärkein syy, jonka vuoksi viimeksi osallistuit hoitoseremoniaan, retriittiin tai ryhmätapahtumaan? | | --- | |
| | Normal | | --- | |
| | 1 | Äkillisesti alkanut vaiva, joka kesti alle kuukauden | | --- | --- | | 2 | Pitkäaikainen terveysongelma (kesto yli kuukauden) tai siihen liittyvä oireiden hoito | | 3 | Hyvinvoinnin lisääminen | | 996 | Muu syy, mikä? **Open *Fixed* | | 999 | En osaa sanoa **Fixed *Exclusive* | |

| | Ask only if **Q069 - VBP**,6 | | --- | |
| --- | --- |
| | Q087 - VBG_Copy_25: | Single coded | | --- | --- | |
| | Not back | | --- | |
| | Kuinka hyödyllistä osallistuminen hoitoseremoniaan, retriittiin tai ryhmätapahtumaan oli sinulle? | | --- | |
| | Normal | | --- | |
| | 1 | Erittäin hyödyllistä | | --- | --- | | 2 | Hieman hyödyllistä | | 3 | Ei hyödyllistä | | 999 | En osaa sanoa **Fixed *Exclusive* | |

| | Ask only if **Q069 - VBP**,6 | | --- | |
| --- | --- |
| | Q085 - VBD_Copy_25: | Numeric | | --- | --- | |
| | Not back | Min = 0 | Max = 900 | | --- | |
| | Kuinka monta kertaa olet osallistunut hoitoseremoniaan, retriittiin tai ryhmätapahtumaan viimeisen 3 kuukauden aikana?  Merkitse lukumäärä numeroina tyhjään tilaan. | | --- | |
| |  | | --- | |
| | 999 | En osaa sanoa **Fixed *Exclusive* | | --- | --- | |

| | Ask only if **Q069 - VBP**,7 | | --- | |
| --- | --- |
| | Q089 - VBF_Copy_26: | Single coded | | --- | --- | |
| | Not back | | --- | |
| | Mikä oli tärkein syy, jonka vuoksi viimeksi rukoilit oman terveytesi puolesta? | | --- | |
| | Normal | | --- | |
| | 1 | Äkillisesti alkanut vaiva, joka kesti alle kuukauden | | --- | --- | | 2 | Pitkäaikainen terveysongelma (kesto yli kuukauden) tai siihen liittyvä oireiden hoito | | 3 | Hyvinvoinnin lisääminen | | 996 | Muu syy, mikä? **Open *Fixed* | | 999 | En osaa sanoa **Fixed *Exclusive* | |

| | Ask only if **Q069 - VBP**,7 | | --- | |
| --- | --- |
| | Q090 - VBG_Copy_26: | Single coded | | --- | --- | |
| | Not back | | --- | |
| | Kuinka hyödyllistä rukoileminen oman terveytesi puolesta oli sinulle? | | --- | |
| | Normal | | --- | |
| | 1 | Erittäin hyödyllistä | | --- | --- | | 2 | Hieman hyödyllistä | | 3 | Ei hyödyllistä | | 999 | En osaa sanoa **Fixed *Exclusive* | |

| | Ask only if **Q069 - VBP**,7 | | --- | |
| --- | --- |
| | Q088 - VBD_Copy_26: | Numeric | | --- | --- | |
| | Not back | Min = 0 | Max = 900 | | --- | |
| | Kuinka monta kertaa olet rukoillut oman terveytesi puolesta viimeisen 3 kuukauden aikana?  Merkitse lukumäärä numeroina tyhjään tilaan. | | --- | |
| |  | | --- | |
| | 999 | En osaa sanoa **Fixed *Exclusive* | | --- | --- | |

| | Ask only if **Q069 - VBP**,8 | | --- | |
| --- | --- |
| | Q092 - VBF_Copy_27: | Single coded | | --- | --- | |
| | Not back | | --- | |
| | Mikä oli tärkein syy, jonka vuoksi viimeksi käytit saunaa terveydenhoitokeinona? | | --- | |
| | Normal | | --- | |
| | 1 | Äkillisesti alkanut vaiva, joka kesti alle kuukauden | | --- | --- | | 2 | Pitkäaikainen terveysongelma (kesto yli kuukauden) tai siihen liittyvä oireiden hoito | | 3 | Hyvinvoinnin lisääminen | | 996 | Muu syy, mikä? **Open *Fixed* | | 999 | En osaa sanoa **Fixed *Exclusive* | |

| | Ask only if **Q069 - VBP**,8 | | --- | |
| --- | --- |
| | Q093 - VBG_Copy_27: | Single coded | | --- | --- | |
| | Not back | | --- | |
| | Kuinka hyödyllistä saunan käyttäminen terveydenhoitokeinona oli sinulle? | | --- | |
| | Normal | | --- | |
| | 1 | Erittäin hyödyllistä | | --- | --- | | 2 | Hieman hyödyllistä | | 3 | Ei hyödyllistä | | 999 | En osaa sanoa **Fixed *Exclusive* | |

| | Ask only if **Q069 - VBP**,8 | | --- | |
| --- | --- |
| | Q091 - VBD_Copy_27: | Numeric | | --- | --- | |
| | Not back | Min = 0 | Max = 900 | | --- | |
| | Kuinka monta kertaa olet käyttänyt saunaa terveydenhoitokeinona viimeisen 3 kuukauden aikana?  Merkitse lukumäärä numeroina tyhjään tilaan. | | --- | |
| |  | | --- | |
| | 999 | En osaa sanoa **Fixed *Exclusive* | | --- | --- | |

| | Ask only if **Q069 - VBP**,9 | | --- | |
| --- | --- |
| | Q095 - VBF_Copy_28: | Single coded | | --- | --- | |
| | Not back | | --- | |
| | Mikä oli tärkein syy, jonka vuoksi viimeksi käytit NLP:tä (neurolingvistinen ohjelmointi)? | | --- | |
| | Normal | | --- | |
| | 1 | Äkillisesti alkanut vaiva, joka kesti alle kuukauden | | --- | --- | | 2 | Pitkäaikainen terveysongelma (kesto yli kuukauden) tai siihen liittyvä oireiden hoito | | 3 | Hyvinvoinnin lisääminen | | 996 | Muu syy, mikä? **Open *Fixed* | | 999 | En osaa sanoa **Fixed *Exclusive* | |

| | Ask only if **Q069 - VBP**,9 | | --- | |
| --- | --- |
| | Q096 - VBG_Copy_28: | Single coded | | --- | --- | |
| | Not back | | --- | |
| | Kuinka hyödyllistä NLP:n (neurolingvistinen ohjelmointi) käyttäminen oli sinulle? | | --- | |
| | Normal | | --- | |
| | 1 | Erittäin hyödyllistä | | --- | --- | | 2 | Hieman hyödyllistä | | 3 | Ei hyödyllistä | | 999 | En osaa sanoa **Fixed *Exclusive* | |

| | Ask only if **Q069 - VBP**,9 | | --- | |
| --- | --- |
| | Q094 - VBD_Copy_28: | Numeric | | --- | --- | |
| | Not back | Min = 0 | Max = 900 | | --- | |
| | Kuinka monta kertaa olet käyttänyt NLP:tä (neurolingvistinen ohjelmointi) viimeisen 3 kuukauden aikana?  Merkitse lukumäärä numeroina tyhjään tilaan. | | --- | |
| |  | | --- | |
| | 999 | En osaa sanoa **Fixed *Exclusive* | | --- | --- | |

| | Ask only if **Q069 - VBP**,10 | | --- | |
| --- | --- |
| | Q098 - VBF_Copy_29: | Single coded | | --- | --- | |
| | Not back | | --- | |
| | Mikä oli tärkein syy, jonka vuoksi viimeksi käytit taidetta (musiikki, tanssi , kirjallisuus, kuvataide) terveydenhoitokeinona? | | --- | |
| | Normal | | --- | |
| | 1 | Äkillisesti alkanut vaiva, joka kesti alle kuukauden | | --- | --- | | 2 | Pitkäaikainen terveysongelma (kesto yli kuukauden) tai siihen liittyvä oireiden hoito | | 3 | Hyvinvoinnin lisääminen | | 996 | Muu syy, mikä? **Open *Fixed* | | 999 | En osaa sanoa **Fixed *Exclusive* | |

| | Ask only if **Q069 - VBP**,10 | | --- | |
| --- | --- |
| | Q099 - VBG_Copy_29: | Single coded | | --- | --- | |
| | Not back | | --- | |
| | Kuinka hyödyllistä taiteen (musiikki, tanssi , kirjallisuus, kuvataide) käyttäminen terveydenhoitokeinona oli sinulle? | | --- | |
| | Normal | | --- | |
| | 1 | Erittäin hyödyllistä | | --- | --- | | 2 | Hieman hyödyllistä | | 3 | Ei hyödyllistä | | 999 | En osaa sanoa **Fixed *Exclusive* | |

| | Ask only if **Q069 - VBP**,10 | | --- | |
| --- | --- |
| | Q097 - VBD_Copy_29: | Numeric | | --- | --- | |
| | Not back | Min = 0 | Max = 900 | | --- | |
| | Kuinka monta kertaa olet käyttänyt taidetta (musiikki, tanssi , kirjallisuus, kuvataide) terveydenhoitokeinona viimeisen 3 kuukauden aikana?  Merkitse lukumäärä numeroina tyhjään tilaan. | | --- | |
| |  | | --- | |
| | 999 | En osaa sanoa **Fixed *Exclusive* | | --- | --- | |

| | Ask only if **Q069 - VBP**,11 | | --- | |
| --- | --- |
| | Q101 - VBF_Copy_30: | Single coded | | --- | --- | |
| | Not back | | --- | |
| | Mikä oli tärkein syy, jonka vuoksi viimeksi hait apua luonnosta terveytesi hoitamiseen? | | --- | |
| | Normal | | --- | |
| | 1 | Äkillisesti alkanut vaiva, joka kesti alle kuukauden | | --- | --- | | 2 | Pitkäaikainen terveysongelma (kesto yli kuukauden) tai siihen liittyvä oireiden hoito | | 3 | Hyvinvoinnin lisääminen | | 996 | Muu syy, mikä? **Open *Fixed* | | 999 | En osaa sanoa **Fixed *Exclusive* | |

| | Ask only if **Q069 - VBP**,11 | | --- | |
| --- | --- |
| | Q102 - VBG_Copy_30: | Single coded | | --- | --- | |
| | Not back | | --- | |
| | Kuinka hyödyllistä avun hakeminen luonnosta terveytesi hoitamiseen oli sinulle? | | --- | |
| | Normal | | --- | |
| | 1 | Erittäin hyödyllistä | | --- | --- | | 2 | Hieman hyödyllistä | | 3 | Ei hyödyllistä | | 999 | En osaa sanoa **Fixed *Exclusive* | |

| | Ask only if **Q069 - VBP**,11 | | --- | |
| --- | --- |
| | Q100 - VBD_Copy_30: | Numeric | | --- | --- | |
| | Not back | Min = 0 | Max = 900 | | --- | |
| | Kuinka monta kertaa olet hakenut apua luonnosta terveytesi hoitamiseen viimeisen 3 kuukauden aikana?  Merkitse lukumäärä numeroina tyhjään tilaan. | | --- | |
| |  | | --- | |
| | 999 | En osaa sanoa **Fixed *Exclusive* | | --- | --- | |

| | Ask only if **Q069 - VBP**,996 | | --- | |
| --- | --- |
| | Q104 - VBF_Copy_31: | Single coded | | --- | --- | |
| | Not back | | --- | |
| | Mikä oli tärkein syy, jonka vuoksi viimeksi käytit muuta keinoa terveytesi hoitamiseen? | | --- | |
| | Normal | | --- | |
| | 1 | Äkillisesti alkanut vaiva, joka kesti alle kuukauden | | --- | --- | | 2 | Pitkäaikainen terveysongelma (kesto yli kuukauden) tai siihen liittyvä oireiden hoito | | 3 | Hyvinvoinnin lisääminen | | 996 | Muu syy, mikä? **Open *Fixed* | | 999 | En osaa sanoa **Fixed *Exclusive* | |

| | Ask only if **Q069 - VBP**,996 | | --- | |
| --- | --- |
| | Q105 - VBG_Copy_31: | Single coded | | --- | --- | |
| | Not back | | --- | |
| | Kuinka hyödyllistä muun keinon käyttäminen terveytesi hoitamiseen oli sinulle viimeksi? | | --- | |
| | Normal | | --- | |
| | 1 | Erittäin hyödyllistä | | --- | --- | | 2 | Hieman hyödyllistä | | 3 | Ei hyödyllistä | | 999 | En osaa sanoa **Fixed *Exclusive* | |

| | Ask only if **Q002 - VBC**,2,3,4,5,6,7,8,9,11,12,13,14,15,16,17,18,19,996 | | --- | |
| --- | --- |
| | Q110 - VBV: | Single coded | | --- | --- | |
| | Not back | | --- | |
| | Miten koronapandemia (COVID-19) vaikutti täydentävien ja vaihtoehtoisten hoitajien palveluiden käyttöösi koronapandemian (2020-2022) aikana? Vähensikö vai lisäsikö pandemia käyttöäsi? | | --- | |
| | Normal | | --- | |
| | 1 | Vähensi paljon | | --- | --- | | 2 | Vähensi jonkin verran | | 3 | Ei lisännyt eikä vähentänyt | | 4 | Lisäsi jonkin verran | | 5 | Lisäsi paljon | | 999 | En osaa/halua sanoa **Fixed *Exclusive* | |

| | Ask only if **Q067 - VBM**,1,2,3,4,5 | | --- | |
| --- | --- |
| | Q111 - VBW: | Single coded | | --- | --- | |
| | Not back | | --- | |
| | Miten koronapandemia (COVID-19) vaikutti luontaistuotteiden ja/tai itseavun keinojen käyttöösi koronapandemian (2020-2022) aikana? Vähensikö vai lisäsikö pandemia käyttöäsi? | | --- | |
| | Normal | | --- | |
| | 1 | Vähensi paljon | | --- | --- | | 2 | Vähensi jonkin verran | | 3 | Ei lisännyt eikä vähentänyt | | 4 | Lisäsi jonkin verran | | 5 | Lisäsi paljon | | 999 | En osaa/halua sanoa **Fixed *Exclusive* | |
|  |

| | Q125 - VCN: | Single coded | | --- | --- | |
| --- | --- | --- |
| | Not back | | --- | |
| | Aiotko käyttää tulevaisuudessa jotakin täydentävää hoitoa? | | --- | |
| | Normal | | --- | |
| | 1 | Kyllä | | --- | --- | | 2 | Todennäköisesti kyllä | | 3 | Todennäköisesti en | | 4 | En | | 999 | En osaa/halua sanoa **Fixed *Exclusive* | |
